# Supplementary material
Source: Research Square preprint supplement (doi:10.21203/rs.3.rs-9761092/v1)
Supplement: Supplementary file 1 [file 27b02a4a9a0456b7b5bbc867.xlsx]

## Sheet: Diferential expression analysis
Differentially expressed genes unfed vs fed condition
GCA_049639745.1 ID	VectorBase ID	NCBI Annotation	Functional category assigned in text and tables	Transcripts accession	Protein accession	baseMean	Log2FoldChange	lfcSE	pvalue	padj	svalue
LOC141448249	RPRC012909-PA	Facilitated Trehalose Transporter Tret1-Like	Energetic metabolism	XM_074116482.1	XP_073972583.1	1238.72	-3.73383	0.245395	1.32e-53	5.46e-51	2.48e-14
LOC141459840	RPRC010096-PA	Protein Takeout-Like	Endocrine regulation	XM_074139371.1	XP_073995472.1	28067.3	-3.4219	0.281579	2.7e-35	5.42e-33	2.48e-14
Hao	RPRC008613-PA	Hydroxyacid Oxidase	Immunity, stress and ROS response	XM_074127485.1	XP_073983586.1	4800.5	-3.35031	0.197941	1.28e-65	7.72e-63	2.48e-14
Cpr	RPRC005729-PA	Cytochrome P450 Reductase	Immunity, stress and ROS response	XM_074115394.1	XP_073971495.1	67688	-3.09981	0.111426	1.4e-171	4.65e-168	2.48e-14
geko	RPRC009865-PA	Geko	Others	XM_074140026.1	XP_073996127.1	4125.1	-2.81247	0.381302	7.54e-15	3.42e-13	9.05e-08
LOC141448706	RPRC009283-PA	Atp-Binding Cassette Sub-Family F Member 2	Transporters	XM_074117244.1	XP_073973345.1	17218.6	-2.4372	0.0816999	8.24e-197	5.46e-193	2.48e-14
Bet1	RPRC014308-PA	Blocked Early In Transport 1	Others	XM_074122181.1	XP_073978282.1	2949.32	-2.43375	0.136328	1.45e-72	1.6e-69	2.48e-14
LOC141462091	Absent	Kynurenine/Alpha-Aminoadipate Aminotransferase, Mitochondrial-Like	Others	XM_074143691.1	XP_073999792.1	8498.65	-2.30125	0.198816	3.16e-32	4.86e-30	4.6e-12
LOC141452813	RPRC008820-PA	Uncharacterized LOC141452813	Others	XM_074125254.1	XP_073981355.1	1147.61	-2.26362	0.508527	3.55e-07	3.95e-06	0.000796104
serp	RPRC000381-PA	Chitin Deacetylase-Like Protein Serp	Immunity, stress and ROS response	XM_074139021.1	XP_073995122.1	2941.69	-2.24108	0.833884	0.000207686	0.00109727	0.0117003
LOC141450513	RPRC003395.P75	Uncharacterized LOC141450513	Others	XM_074121018.1	XP_073977119.1	987.284	-2.17046	0.386391	8.86e-10	1.81e-08	8.12e-05
LOC141460084	RPRC012177-PA	Defensin-Like	Immunity, stress and ROS response	XM_074139755.1	XP_073995856.1	2227.03	-2.15531	0.756114	0.000137107	0.000775029	0.0091478
FRG1	RPRC015081-PA	Fshd Region Gene 1	Others	XM_074120600.1	XP_073976701.1	1129.88	-2.06509	0.211746	9.51e-24	1e-21	2.76e-08
Acsf2	RPRC011528-PA	Acyl-Coa Synthetase Family Member 2	Energetic metabolism	XM_074134734.1	XP_073990835.1	1966.36	-2.02938	0.0788929	3.58e-147	7.9e-144	2.48e-14
LOC141459494	RPRC017803-PA	Uncharacterized LOC141459494	Others	XM_074138633.1	XP_073994734.1	2356.16	-1.98804	0.152335	5.82e-40	1.68e-37	9.66e-12
Mhc	RPRC012274-PA	Myosin Heavy Chain	Muscular physiology	XM_074126434.1	XP_073982535.1	20878.6	-1.98169	0.340007	2.5e-10	5.59e-09	0.000128949
LOC141459809	RPRC005741-PA	Cysteine Dioxygenase Type 1	Others	XM_074139319.1	XP_073995420.1	8441.76	-1.92861	0.286705	8.64e-13	3.01e-11	5.03e-05
Mf	RPRC013083-PA	Myofilin	Muscular physiology	XM_074125321.1	XP_073981422.1	1754.51	-1.90263	0.20203	2.45e-22	2.32e-20	2.58e-07
Usp2	RPRC008963-PA	Ubiquitin Specific Protease 2	Immunity, stress and ROS response	XM_074122014.1	XP_073978115.1	5559.4	-1.84727	0.0796421	3.14e-120	5.2e-117	2.48e-14
LOC141452597	RPRC015024-PA	Udp-Glycosyltransferase Ugt4-Like	Others	XM_074124903.1	XP_073981004.1	1848.23	-1.81083	0.447732	2.16e-06	1.94e-05	0.00540108
LOC141450353	RPRC006132-PA	U6 Snrna Phosphodiesterase 1	Others	XM_074120707.1	XP_073976808.1	1451.62	-1.80853	0.111668	2.86e-60	1.58e-57	2.48e-14
LOC141455279	RPRC002032-PA	An1-Type Zinc Finger Protein 2a-Like	Others	XM_074130196.1	XP_073986297.1	1228	-1.80147	0.140616	7.82e-39	2.16e-36	3.65e-10
LOC141456484	RPRC011753-PA	Leucine-Rich Repeat-Containing Protein 58	Immunity, stress and ROS response	XM_074132513.1	XP_073988614.1	3618.23	-1.78264	0.154491	4.68e-32	7.05e-30	1.61e-08
LOC141456296	RPRC013229-PA	Sodium/Hydrogen Exchanger 9b2-Like	Others	XM_074132170.1	XP_073988271.1	1171.83	-1.76578	0.198617	3.3e-20	2.66e-18	6.65e-06
Ns2	RPRC006095-PA	Nucleostemin 2	Others	XM_074125012.1	XP_073981113.1	1276.13	-1.71649	0.145729	2.75e-33	4.45e-31	4.72e-08
RanBP3	RPRC017863.P187	Ran-Binding Protein 3	Others	XM_074120974.1	XP_073977075.1	3367.65	-1.70899	0.100751	8.8e-66	5.83e-63	1.21e-13
LOC141455949	RPRC015388-PA	Peroxiredoxin-6-Like	Immunity, stress and ROS response	XM_074131465.1	XP_073987566.1	3224.08	-1.70681	0.505096	2.92e-05	0.000199623	0.0162356
GCC88	RPRC010742-PA	Grip And Coiled-Coil Domain Containing 88 Kda	Others	XM_074125775.1	XP_073981876.1	1201.16	-1.70606	0.107392	4.23e-58	2.16e-55	2.51e-12
Mp20	RPRC014181-PA	Muscle-Specific Protein 20 Transgelin	Muscular physiology	XM_074138652.1	XP_073994753.1	6058.35	-1.69746	0.474939	1.36e-05	0.000101312	0.0134172
Prm	RPRC012167-PA	Paramyosin	Muscular physiology	XM_074118870.1	XP_073974971.1	5836.15	-1.63014	0.555418	0.000123803	0.000707725	0.0252187
LOC141456376	RPRC004165-PA	Transcription Initiation Protein Spt3 Homolog	Transcription and translation processes	XM_074132304.1	XP_073988405.1	1654.08	-1.60395	0.0929548	6.14e-68	4.52e-65	7.2e-12
LOC141453322	RPRC004408-PA	General Odorant-Binding Protein 56d-Like	Others	XM_074126389.1	XP_073982490.1	5105.5	-1.60273	0.596059	0.000248468	0.00127407	0.0370903
Sam-S	RPRC012101-PA	S-Adenosylmethionine Synthetase	Others	XM_074129855.1	XP_073985956.1	33979.5	-1.56702	0.0880263	3.47e-72	3.29e-69	1.27e-11
LOC141456933	RPRC011609-PA	Hig1 Domain Family Member 1a, Mitochondrial-Like	Others	XM_074133348.1	XP_073989449.1	1193.09	-1.55968	0.130582	4.06e-34	7.68e-32	1.2e-06
Mlc2	RPRC003954-PA	Myosin Regulatory Light Chain 2	Muscular physiology	XM_074113236.1	XP_073969337.1	7523.07	-1.55863	0.30858	2.26e-08	3.38e-07	0.00591351
LOC141461073	RPRC009292-PA	Protein Tumorous Imaginal Discs, Mitochondrial-Like	Immunity, stress and ROS response	XM_074141752.1	XP_073997853.1	5621.77	-1.55084	0.13077	7.9e-34	1.45e-31	1.61e-06
LOC141446939	RPRC004893-PA	Atp-Binding Cassette Sub-Family F Member 3	Others	XM_074113955.1	XP_073970056.1	5152.56	-1.52629	0.101093	1.19e-52	4.64e-50	5.71e-09
bt	RPRC003284-PA	Projectin Protein Bent	Immunity, stress and ROS response	XM_074134273.1	XP_073990374.1	2389.93	-1.51941	0.491243	7.97e-05	0.000482795	0.0344332
up	RPRC006561-PA	Troponin T, Skeletal Muscle	Muscular physiology	XM_074143290.1	XP_073999391.1	3831.01	-1.51439	0.642511	0.000598422	0.00271544	0.0477658
Mlc1	RPRC012367-PA	Myosin Light Chain Alkali	Muscular physiology	XM_074129310.1	XP_073985411.1	3406.85	-1.48573	0.269938	1.98e-09	3.71e-08	0.00642305
sls	RPRC017887.P211	Sallimus	Immunity, stress and ROS response	XM_074118099.1	XP_073974200.1	8336.6	-1.47674	0.273068	3.38e-09	6e-08	0.00698963
LOC141456312	RPRC013228-PA	Uncharacterized LOC141456312	Others	XM_074132214.1	XP_073988315.1	1575.62	-1.46225	0.352312	1.65e-06	1.52e-05	0.0182582
LOC141458491	RPRC009667-PA	Atp-Dependent Rna Helicase Ddx54	Others	XM_074136555.1	XP_073992656.1	3709.03	-1.45314	0.122338	9.25e-34	1.66e-31	1.22e-05
wupA	Absent	Troponin Wings Up A	Muscular physiology	XM_074143836.1	XP_073999937.1	2706.47	-1.44583	0.489633	0.000126698	0.000723276	0.0428614
Droj2	RPRC007155-PA	Dnaj Heat Shock Protein Family (Hsp40) Member A4-Like	Immunity, stress and ROS response	XM_074115831.1	XP_073971932.1	8626.55	-1.43984	0.10042	7.71e-48	2.55e-45	6.85e-07
LOC141454960	RPRC010422-PA	Iron-Sulfur Clusters Transporter Abcb7, Mitochondrial-Like	Transporters	XM_074129686.1	XP_073985787.1	1493.25	-1.42244	0.096582	2.53e-50	8.84e-48	8.94e-07
LOC141450900	RPRC001077-PA	Mpv17-Like Protein 2	Others	XM_074121789.1	XP_073977890.1	1619.79	-1.40094	0.182429	9.37e-16	4.89e-14	0.00156604
HBS1	RPRC005628-PA	Translation Elongation Factor Ef-1alpha (Gtpase) Hbs1	Transcription and translation processes	XM_074118951.1	XP_073975052.1	4937.15	-1.36777	0.0916016	1.26e-51	4.62e-49	3.27e-06
glu	RPRC015159-PA	Structural Maintenance Of Chromosomes 4-Like Protein Gluon	Others	XM_074135409.1	XP_073991510.1	1090.78	-1.3627	0.109733	1.31e-36	3.09e-34	3.5e-05
PCB	RPRC008452-PA	Pyruvate Carboxylase	Energetic metabolism	XM_074125151.1	XP_073981252.1	1899.15	-1.33526	0.0760858	4.13e-70	3.42e-67	4.67e-07
LOC141461702	RPRC010647-PA	Uncharacterized LOC141461702	Others	XM_074142945.1	XP_073999046.1	2873.94	-1.32174	0.2171	6.65e-11	1.62e-09	0.0125581
Ctps	RPRC014473-PA	Ctp Synthase	Others	XM_074128163.1	XP_073984264.1	3135.41	-1.31832	0.0854322	6.2e-55	2.93e-52	9.4e-06
LOC141461127	RPRC007977-PA	Ribosome Biogenesis Regulatory Protein Homolog	Others	XM_074141857.1	XP_073997958.1	1181.52	-1.3083	0.124903	3.28e-27	3.95e-25	0.000926338
LOC141453702	RPRC003539-PA	Uncharacterized LOC141453702	Others	XM_074127220.1	XP_073983321.1	3110.16	-1.30204	0.197843	2.81e-12	8.91e-11	0.00999584
LOC141457325	RPRC007928-PA	Ribosome Biogenesis Protein Nop53	Others	XM_074134161.1	XP_073990262.1	1342.45	-1.28411	0.0841916	1.01e-53	4.46e-51	2.25e-05
eIF1	RPRC002700-PA	Eukaryotic Translation Initiation Factor Eif1	Transcription and translation processes	XM_074119030.1	XP_073975131.1	10052.7	-1.2834	0.108366	1.04e-33	1.76e-31	0.000431241
Lmpt	RPRC006613-PA	Four And A Half Lim Domains Protein Limpet	Muscular physiology	XM_074126566.1	XP_073982667.1	2019.33	-1.27886	0.259898	4.84e-08	6.66e-07	0.030453
Actn	RPRC011132-PA	Alpha Actinin	Muscular physiology	XM_074125116.1	XP_073981217.1	13880.6	-1.27791	0.219458	3.91e-10	8.38e-09	0.0204267
LOC141461795	RPRC002639-PA	Uncharacterized LOC141461795	Others	XM_074143137.1	XP_073999238.1	1580.28	-1.26912	0.191008	1.85e-12	6.1e-11	0.0143738
LOC141448715	RPRC000798-PA	Map Kinase-Interacting Serine/Threonine-Protein Kinase 1-Like	Others	XM_074117257.1	XP_073973358.1	6510.6	-1.25518	0.102486	1.13e-35	2.34e-33	0.000666922
EMC8-9	RPRC014018-PA	Er Membrane Protein Complex Subunit 8/9	Others	XM_074112514.1	XP_073968615.1	2058.51	-1.25359	0.114156	3.04e-29	4.2e-27	0.00130735
LOC141453373	RPRC015085-PA	Protein Cnppd1	Others	XM_074126520.1	XP_073982621.1	1025.21	-1.23115	0.119789	5.69e-26	6.61e-24	0.00287278
bic	RPRC003969-PA	Bicaudal	Transcription and translation processes	XM_074113237.1	XP_073969338.1	7777.14	-1.22677	0.119834	9.1e-26	1.02e-23	0.003847
Mlp60A	RPRC008211-PA	Muscle Lim Protein At 60a	Muscular physiology	XM_074143226.1	XP_073999327.1	3152.36	-1.22409	0.213308	5.64e-10	1.2e-08	0.035724
EMC5	RPRC005878-PA	Er Membrane Protein Complex Subunit 5	Others	XM_074132372.1	XP_073988473.1	1313.42	-1.21715	0.0883369	2.29e-44	7.23e-42	0.00105515
LOC141452815	RPRC008827-PA	Mitochondrial Import Inner Membrane Translocase Subunit Tim17-B-Like	Others	XM_074125258.1	XP_073981359.1	5518.46	-1.18624	0.0999055	1.07e-33	1.76e-31	0.0043434
Karybeta3	RPRC007234-PA	Karyopherin Beta 3	Transporters	XM_074115959.1	XP_073972060.1	6885.87	-1.17337	0.126569	1.1e-21	9.69e-20	0.0171958
LOC141448867	RPRC005966-PA	Probable Atp-Dependent Rna Helicase Ddx5	Others	XM_074117649.1	XP_073973750.1	20897.3	-1.1367	0.0898839	8.14e-38	2.16e-35	0.010829
chico	RPRC001720-PA	Insulin Receptor Substrate 1 Chico	Endocrine regulation	XM_074133915.1	XP_073990016.1	1189.49	-1.13632	0.111431	1.46e-25	1.61e-23	0.022701
REG	RPRC009319-PA	Proteasome Regulator Gamma	Others	XM_074114419.1	XP_073970520.1	3936.54	-1.13589	0.121587	6.4e-22	5.73e-20	0.0278123
LOC141454111	RPRC007243-PA	Lutropin-Choriogonadotropic Hormone Receptor-Like	Endocrine regulation	XM_074127963.1	XP_073984064.1	1132.04	-1.1258	0.105261	7.52e-28	9.41e-26	0.0238973
LOC141455809	RPRC005778-PA	Dnaj Homolog Subfamily A Member 2-Like	Immunity, stress and ROS response	XM_074131227.1	XP_073987328.1	7792.85	-1.11894	0.0950398	3.71e-33	5.85e-31	0.0215445
Bub3	RPRC002441-PA	Mitotic Checkpoint Protein Bub3	Others	XM_074143277.1	XP_073999378.1	1087.35	-1.10786	0.101426	6.14e-29	8.14e-27	0.0318022
slmo	RPRC004395-PA	Preli Domain Containing Slowmo	Others	XM_074132491.1	XP_073988592.1	6758.79	-1.09802	0.101933	3.26e-28	4.15e-26	0.0413404
LOC141451463	RPRC015263-PA	Rcc1 And Btb Domain-Containing Protein 1-Like	Others	XM_074122870.1	XP_073978971.1	987.215	-1.09608	0.0976029	2.03e-30	2.93e-28	0.0384991
LOC141448907	RPRC010359.P8	Clavesin-1-Like	Others	XM_074117767.1	XP_073973868.1	1838.05	1.1058	0.122365	1.16e-20	9.52e-19	0.046022
CCT5	RPRC013014-PA	Chaperonin Containing Tcp1 Subunit 5	Immunity, stress and ROS response	XM_074127899.1	XP_073984000.1	3287.05	1.12122	0.151959	1.16e-14	5.17e-13	0.049482
CCT1	RPRC011654-PA	Chaperonin Containing Tcp1 Subunit 1	Immunity, stress and ROS response	XM_074135973.1	XP_073992074.1	3084.06	1.12514	0.142067	1.7e-16	1.03e-14	0.044435
LOC141460557	RPRC001012-PA	Uncharacterized LOC141460557	Others	XM_074140701.1	XP_073996802.1	3179.96	1.17582	0.182318	7.38e-12	2.14e-10	0.0399317
IleRS	RPRC000394-PA	Isoleucyl-Trna Synthetase	Others	XM_074143617.1	XP_073999718.1	1732.18	1.18243	0.161049	1.4e-14	6.18e-13	0.0265117
LOC141451334	RPRC008372-PA	Tubulin Alpha-1a Chain	Others	XM_074122622.1	XP_073978723.1	6793.45	1.19095	0.135956	1.4e-19	1.07e-17	0.0153125
beta-PheRS	RPRC009645-PA	Phenylalanine--Trna Ligase Beta Subunit	Others	XM_074136566.1	XP_073992667.1	938.666	1.21163	0.190379	1.26e-11	3.49e-10	0.0290969
eIF3m	RPRC009587-PA	Eukaryotic Translation Initiation Factor 3 Subunit M	Transcription and translation processes	XM_074120586.1	XP_073976687.1	1036.32	1.23475	0.221572	1.53e-09	2.95e-08	0.0331303
Stip1	RPRC001497-PA	Stress-Induced Phosphoprotein 1	Immunity, stress and ROS response	XM_074133865.1	XP_073989966.1	1248.35	1.29679	0.156731	8.27e-18	5.7e-16	0.0033683
r	RPRC004924-PA	Carbamoyl-Phosphate Synthetase 2, Aspartate Transcarbamylase, And Dihydroorotase Rudimentary	Others	XM_074125715.1	XP_073981816.1	913.639	1.30408	0.18571	1.36e-13	5.38e-12	0.008275
LOC141447776	RPRC011188-PA	Uncharacterized LOC141447776	Others	XM_074115614.1	XP_073971715.1	2210.48	1.34363	0.131071	7.69e-26	8.78e-24	0.000333009
Fkbp39	RPRC004688-PA	Fk506-Binding Protein 39kd	Others	XM_074121795.1	XP_073977896.1	3870.27	1.36267	0.211096	6.51e-12	1.91e-10	0.00757828
Calr	RPRC003340-PA	Calreticulin	Others	XM_074121002.1	XP_073977103.1	13002.8	1.40399	0.206907	7.52e-13	2.65e-11	0.00240311
Manf	RPRC013509-PA	Mesencephalic Astrocyte-Derived Neurotrophic Factor	Others	XM_074118623.1	XP_073974724.1	1016.76	1.48599	0.18787	1.51e-16	9.26e-15	0.000533837
Pgm1	RPRC011959-PA	Phosphoglucose Mutase 1	Energetic metabolism	XM_074118731.1	XP_073974832.1	1962.95	1.52242	0.0765863	3.65e-89	4.84e-86	5.2e-13
FASN1	RPRC000269-PA	Fatty Acid Synthase 1	Energetic metabolism	XM_074112569.1	XP_073968670.1	2695.16	2.02632	0.265955	1.36e-15	6.87e-14	5e-06
LOC141458377	RPRC007528-PA	Hexamerin-Like	Others	XM_074136274.1	XP_073992375.1	1010.52	2.39377	1.07047	0.000631862	0.00284961	0.0193149
slf	RPRC000618.P28	C-Type Lectin Domain-Containing Protein Slf	Immunity, stress and ROS response	XM_074130598.1	XP_073986699.1	3941.59	3.01445	1.10301	0.00017338	0.000946943	0.00487122
LOC141458382	RPRC000617-PA	Acyl-Coa Delta-9 Desaturase-Like	Energetic metabolism	XM_074136282.1	XP_073992383.1	1448.66	3.30573	0.566395	2.49e-10	5.59e-09	2.36e-06
LOC141460085	RPRC012180-PA	Defensin-Like	Immunity, stress and ROS response	XM_074139756.1	XP_073995857.1	1716.61	5.30622	2.10481	0.000174821	0.00095196	0.00194238
LOC141460023	RPRC003866-PA	Uncharacterized LOC141460023	Others	XM_074139625.1	XP_073995726.1	1967.01	6.95472	2.26284	NA	NA	0.000231977
