# Supplementary material
Source: Research Square preprint supplement (doi:10.21203/rs.3.rs-9761092/v1)
Supplement: Supplementary file 2 [file e0e3eac3c9db4d667d44316b.xlsx]

## Sheet: Additional file 1
Additional file 1. Sequencing results, read processing and mapping metrics. The number of raw reads and those resulting after the filtering step are informed. Mapping results to both VectorBase-68 and GCF_049639745.1 genome assemblies are shown. U: unfed samples; F: fed samples.
Sample	Number of raw reads	Number of trimmed reads	VectorBase-68		GCF_049639745.1
			Number of uniquely mapped reads	% of uniquely mapped reads	Number of uniquely mapped reads	% of uniquely mapped reads	Number of uniquely mapped reads to features
U1	22571327	21970441	16641435	75.7447	19305199	87.869	15780247
U2	22752306	22112103	16440766	74.3519	19345486	87.4882	15974956
U3	25177537	24586028	18972771	77.1689	21871949	88.9609	17774683
U4	22958822	22475217	17441834	77.6047	20111520	89.4831	16516889
F1	27713861	26848298	20570267	76.6167	23682562	88.2088	19000555
F2	24563819	24082497	18406992	76.4331	21357866	88.6863	17852437
F3	22570858	21973728	17272467	78.6051	19515278	88.8119	16385723
F4	20938235	20505262	15734892	76.7359	18158255	88.5541	14766388
